# Supplementary material for: A Universally Applicable Strategy for Construction of Anti‐Biofouling Adsorbents for Enhanced Uranium Recovery from Seawater
Source: PubMed Central journal article supplement (PMC6662298; doi:10.1002/advs.201900002), 2019-03-20
Supplement: ADVS-6-1900002-s001.pdf [file ADVS-6-1900002-s001.pdf]

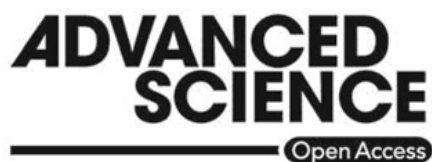

## Supporting Information

for *Adv. Sci.*, DOI: 10.1002/adv.201900002

A Universally Applicable Strategy for Construction of Anti-Biofouling Adsorbents for Enhanced Uranium Recovery from Seawater

*Qiuhan Yu, Yihui Yuan,\* Jun Wen, Xuemei Zhao, Shilei Zhao, Dong Wang, Chaoyang Li, Xiaolin Wang, and Ning Wang\**

Supporting Information

**Universally Applicable Strategy for Construction of  
Anti-biofouling Adsorbents for Enhanced Uranium  
Recovery from Seawater**

Qiuhan Yu, Yihui Yuan\*, Jun Wen, Xuemei Zhao, Shilei Zhao, Dong Wang, Chaoyang  
Li, Xiaolin Wang, Ning Wang\*

Q. Yu, Dr. Y. Yuan, X. Zhao, S. Zhao, Dr. D. Wang, Prof. C. Li, Prof. N. Wang

State Key Laboratory of Marine Resource Utilization in South China Sea

Hainan University

Haikou 570228, P. R. China

Email: yuanyh@hainu.edu.cn; wangn02@foxmail.com

Dr. J. Wen, Prof. X. Wang

Institute of Nuclear Physics and Chemistry

China Academy of Engineering Physics

Mianyang 621900, P. R. China

## Figures and Tables

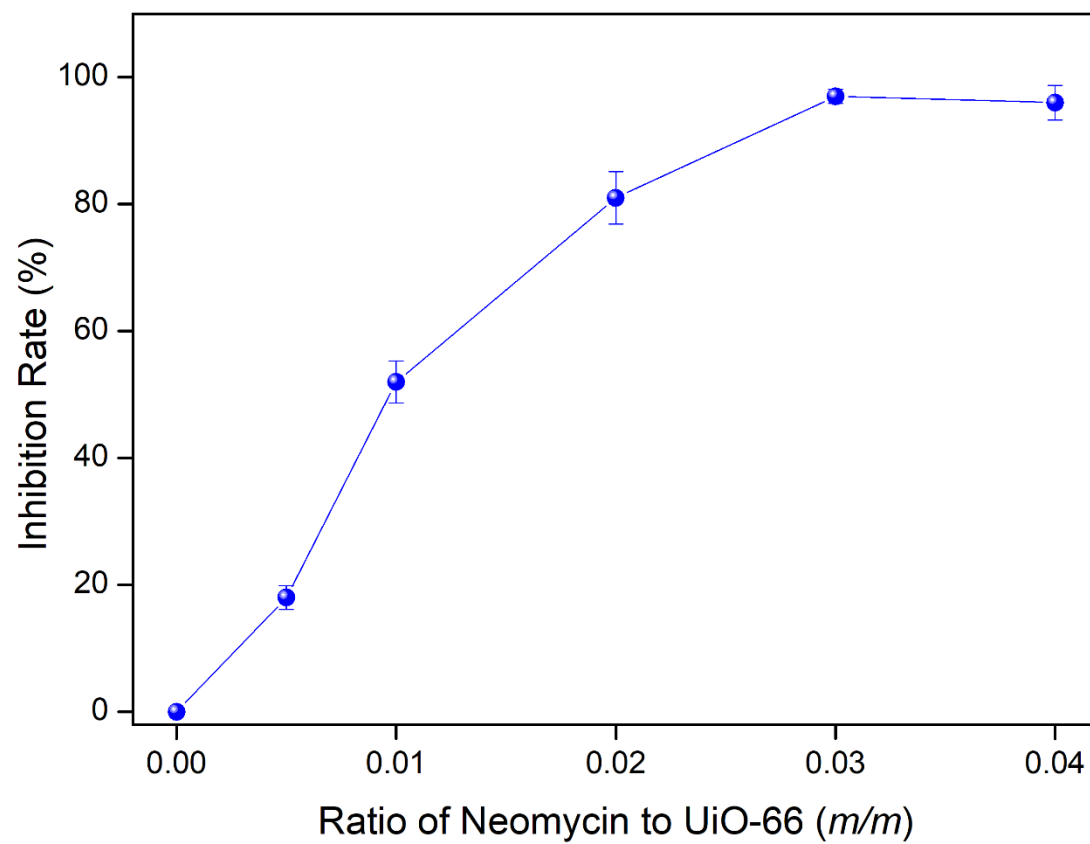

**Figure S1.** Antibacterial activity of UiO-66 fabricated with different ratios of neomycin.

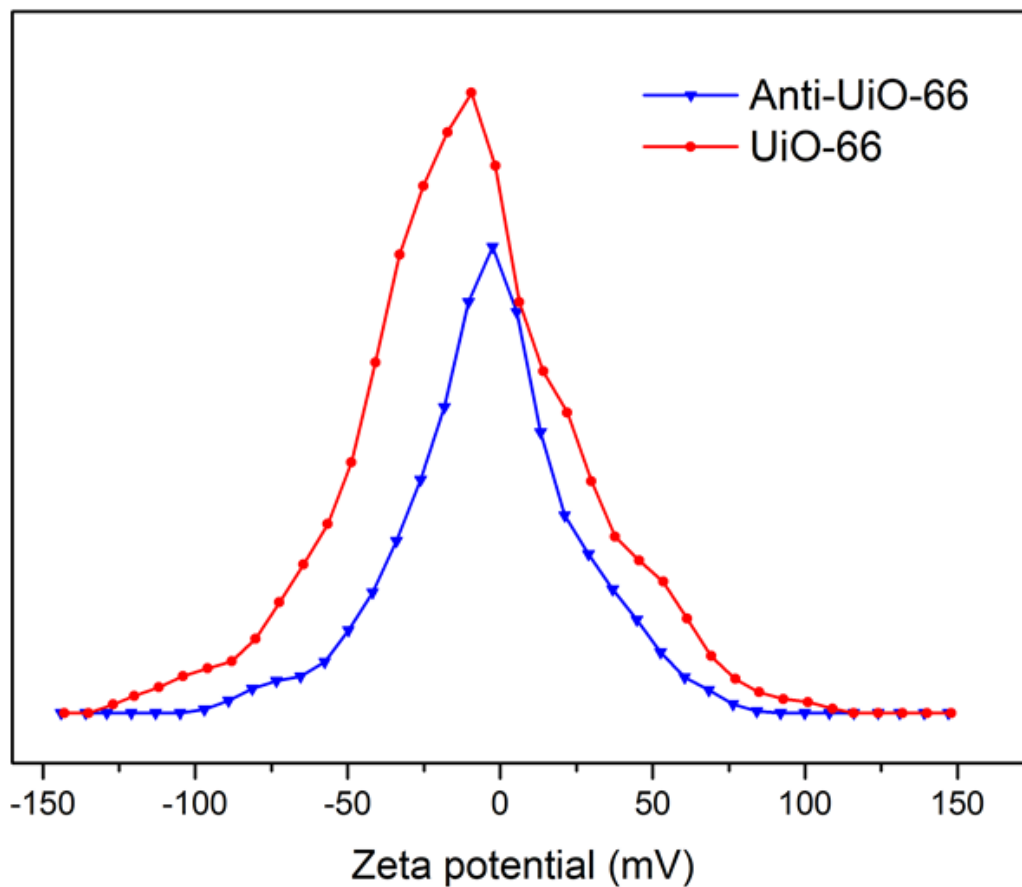

Figure S2. Zeta potential of UiO-66 and Anti-UiO-66 in deionized water

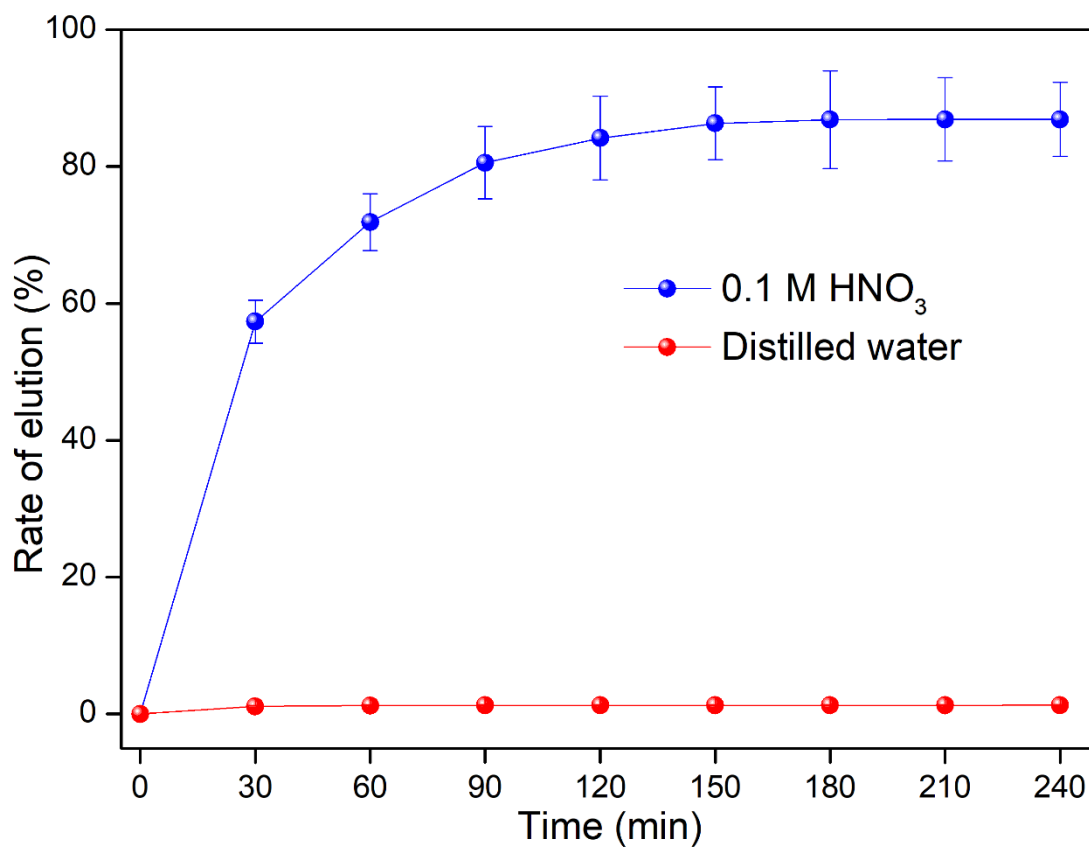

**Figure S3.** Elution uranium form uranium-loaded Anti-UiO-66.

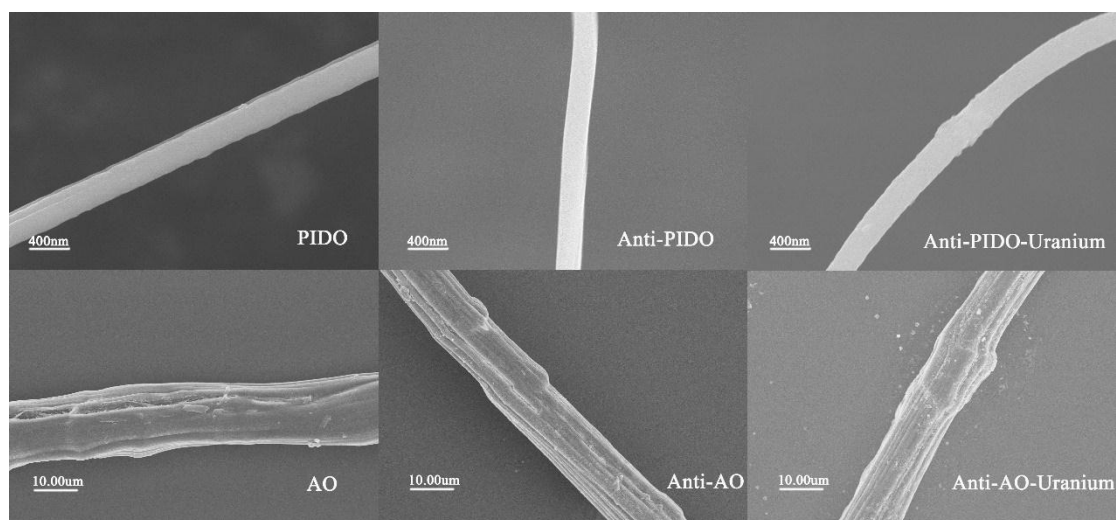

**Figure S4.** SEM of PIDO (PIDO, Anti-PIDO, Anti-PIDO-Uranium) and AO (AO, Anti-AO, Anti-AO-Uranium)

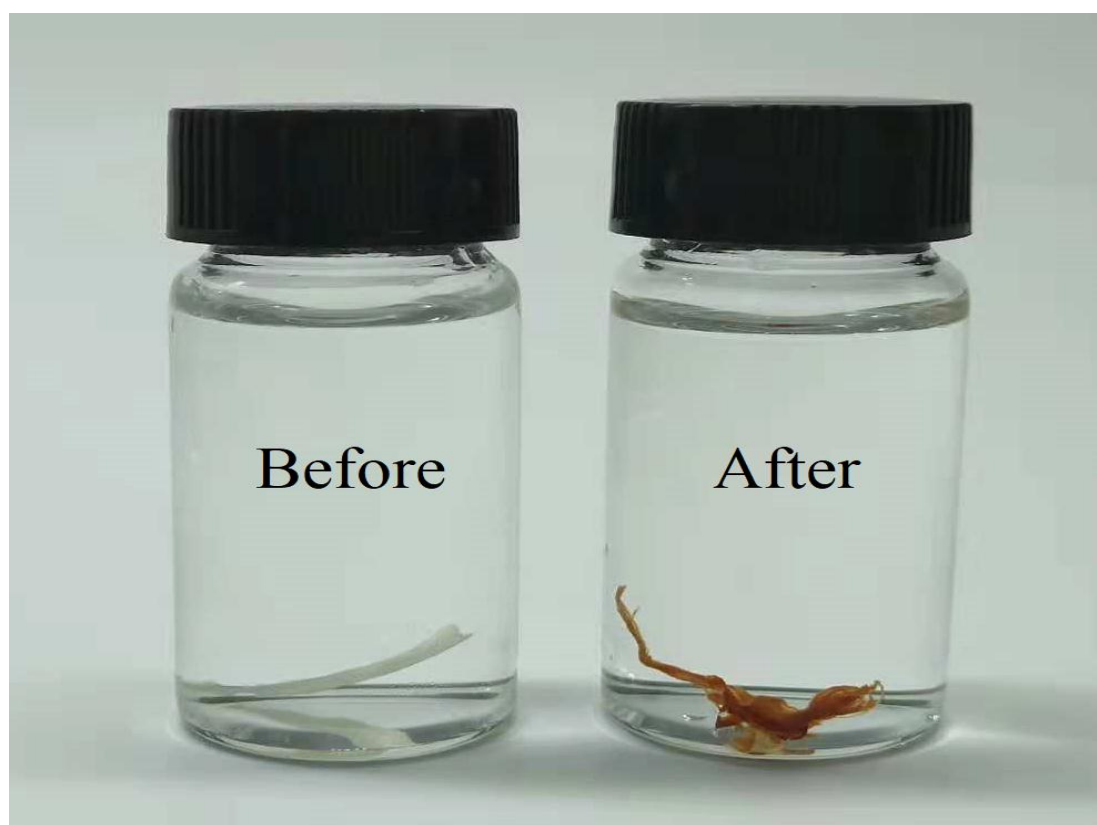

**Figure S5.** Morphology of Anti-PIDO before and after uranium loading.

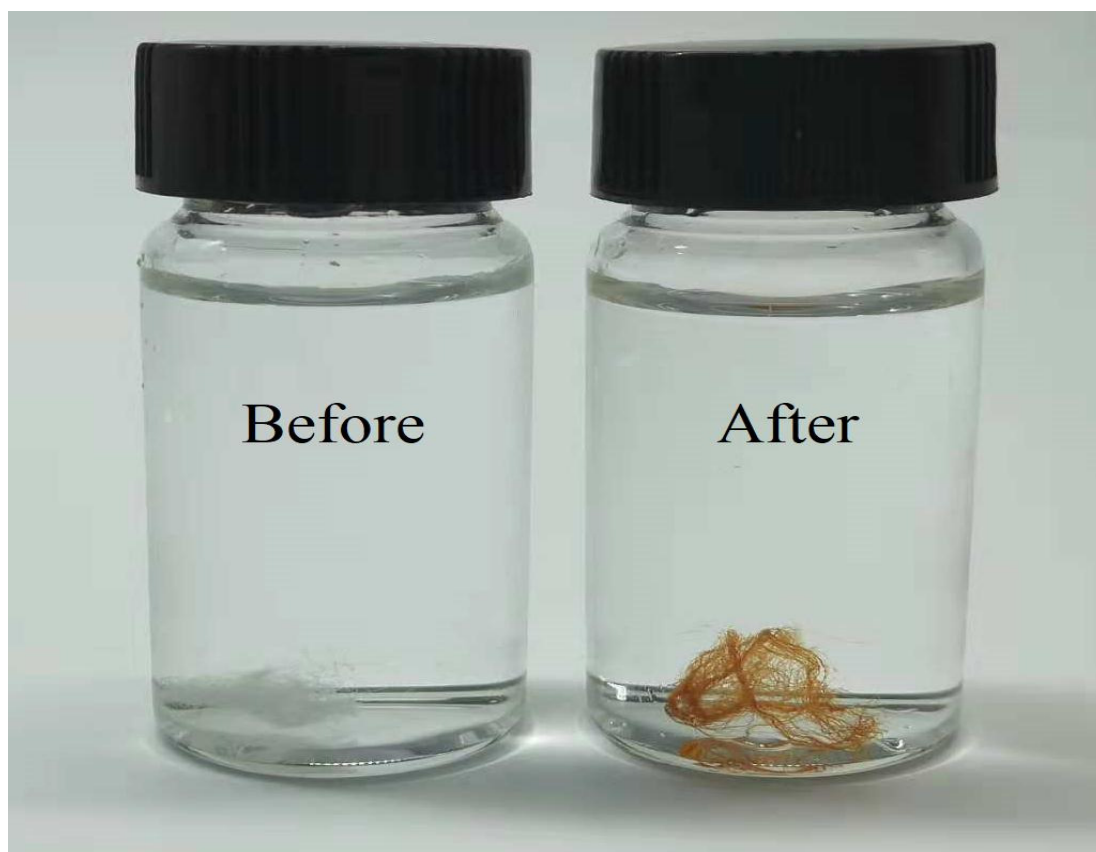

**Figure S6.** Morphology of Anti-AO before and after uranium adsorption.

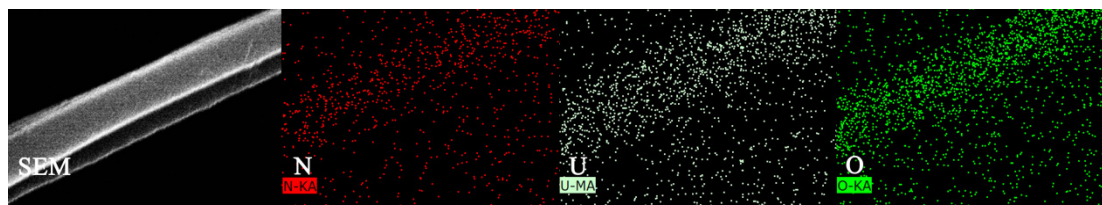

**Figure S7.** SEM image and EDS analysis of Anti-PIDO after adsorption
